# Supplementary material for: Role of Positive and Negative Emotion Regulation in Well-being and Health: The Interplay between Positive and Negative Emotion Regulation Abilities is Linked to Mental and Physical Health
Source: Springer Nature journal article supplement (doi:10.1007/s10902-024-00714-1), 2024-02-01
Supplement: MOESM1 [file 26731738]

Supplementary Table 1. Mean response time (ms) and standard deviations under each condition.

|  | Cue type | | | | | | | |
| --- | --- | --- | --- | --- | --- | --- | --- | --- |
|  | No | | Center | | Double | | Spatial | |
|  | M | SD | M | SD | M | SD | M | SD |
| Neutral | 547 | 94 | 496 | 92 | 495 | 91 | 470 | 93 |
| Congruent | 553 | 96 | 501 | 93 | 498 | 95 | 474 | 97 |
| Incongruent | 646 | 107 | 623 | 107 | 612 | 106 | 569 | 111 |

*Note*. M = mean, SD = standard deviation.

Supplementary Table 2. Result of the structural equation model for predicting the overall health with emotion regulation abilities.

| Relationship | | | *β* | ***p*** | ***95% CI*** | |
| --- | --- | --- | --- | --- | --- | --- |
| ***Lower*** | ***Upper*** |
| Health | ← | Sex | 0.003 | .947 | 1.078 | 1.154 |
| Health | ← | Positive emotion regulation | 0.920 | < .001 | 0.688 | 0.346 |
| Health | ← | Negative emotion regulation | 1.442 | < .001 | 0.898 | 0.440 |
| Health | ← | Positive emotion regulation × negative emotion regulation | 1.410 | < .001 | 0.003 | 0.008 |
| Depression | ← | Health | 0.777 | < .001 | 1.000 | 1.000 |
| Anxiety | ← | Health | 0.796 | < .001 | 0.595 | 0.737 |
| Stress | ← | Health | 0.907 | < .001 | 0.916 | 1.108 |
| Physical health | ← | Health | 0.550 | < .001 | 0.311 | 0.432 |

*Note.**β*= standardized partial regression coefficient.

Supplementary Figure 1. Schematic diagram of the relationship between overall health and emotion regulation abilities.


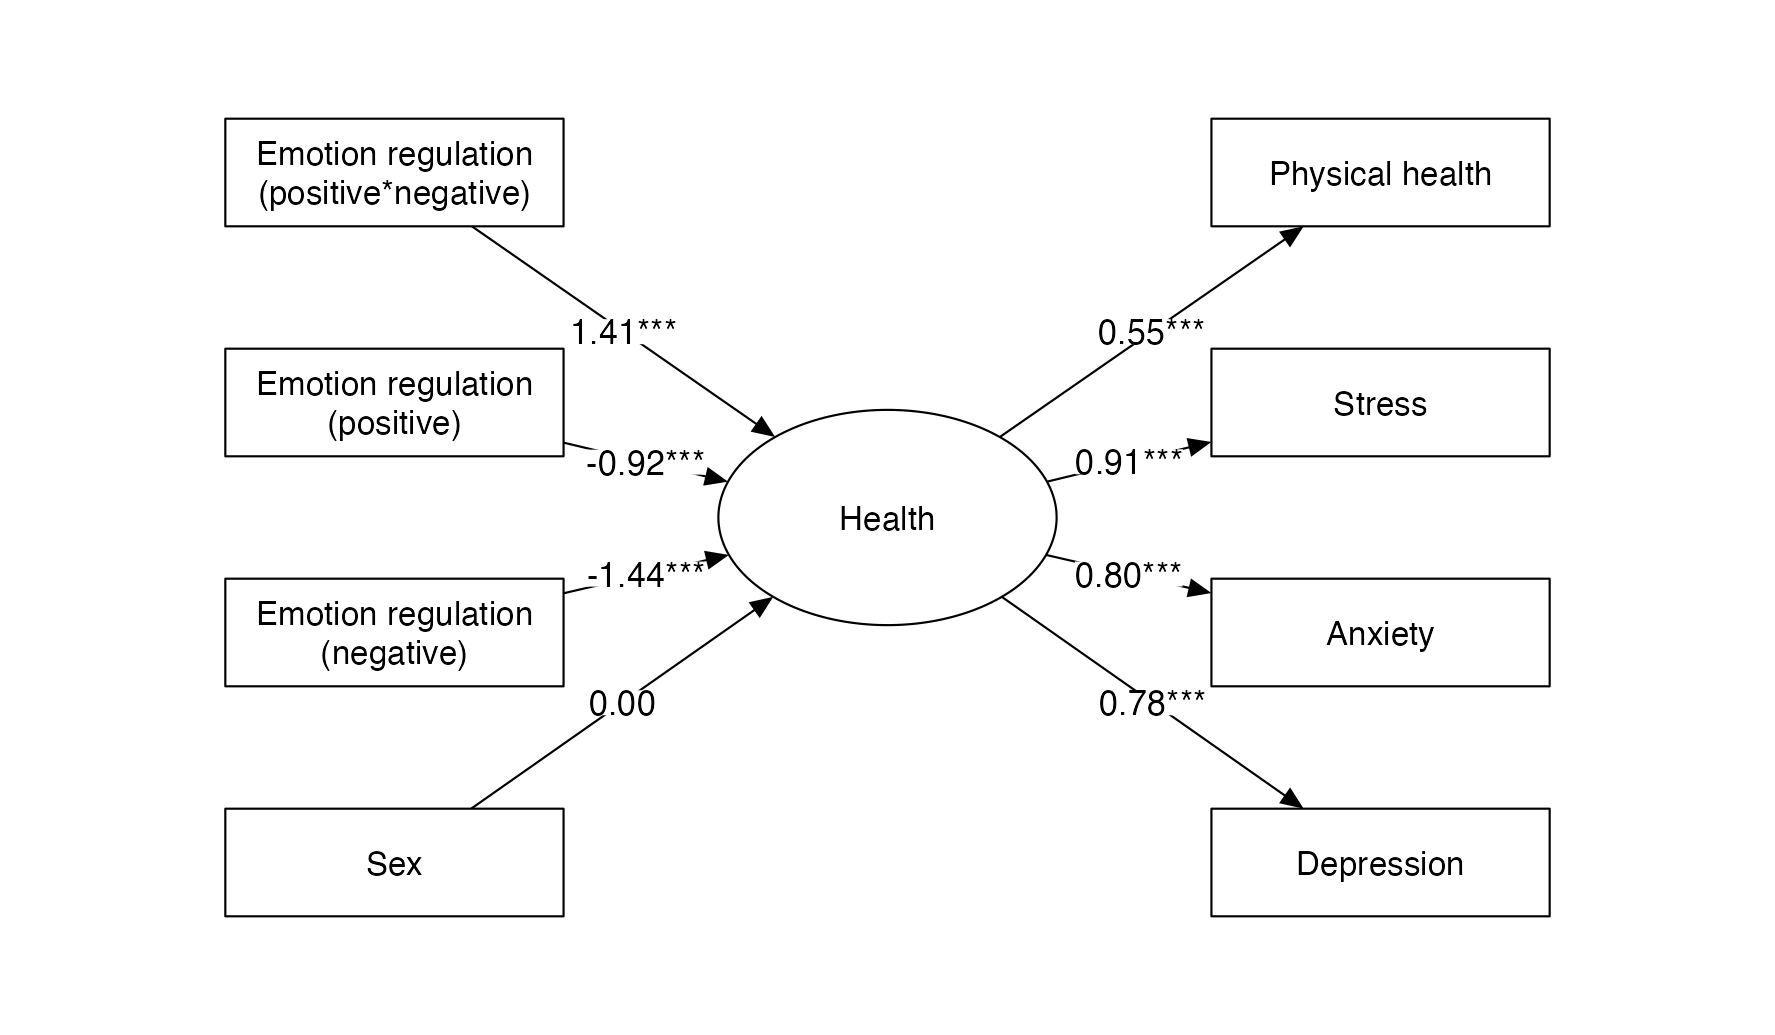


Note. ﻿The values on each path are standardized estimates of path coefficients; the values with stars indicate significant paths (****p* < .001). The model included residuals toward the latent variable and dependent variables but we omitted those residuals in the figure.

Supplementary Table 3. Results of multiple regression analyses for predicting hedonic balance.

| Dependent variable | Independent variables | ***β*** | ***t*** | ***p*** | ***95% CI*** | | ***R2*** |
| --- | --- | --- | --- | --- | --- | --- | --- |
| ***Lower*** | ***Upper*** |
| **Hedonic Balance** | |  |  |  |  |  | .244 |
|  | Sex | 0.011 | 0.136 | .892 | -2.047 | 2.352 |  |
|  | Positive emotion regulation | 0.170 | 3.787 | < .001 | 0.087 | 0.273 |  |
|  | Negative emotion regulation | 0.402 | 8.894 | < .001 | 0.275 | 0.431 |  |
|  | Positive emotion regulation × negative emotion regulation | 0.040 | 1.090 | .276 | 0.007 | 0.002 |  |

*Note.**β*= standardized partial regression coefficient.

Supplementary Table 4. Result of the multiple regression analysis for predicting emotion regulation abilities with attention control.

| Dependent variables | Independent variables | ***β*** | ***t*** | ***p*** | ***95% CI*** | | ***R2*** |
| --- | --- | --- | --- | --- | --- | --- | --- |
| ***Lower*** | ***Upper*** |
| **Positive emotion regulation** | |  |  |  |  |  | .000 |
|  | Alerting | -0.040 | 0.871 | .384 | -0.063 | 0.024 |  |
|  | Orienting | 0.022 | 0.479 | .632 | -0.035 | 0.057 |  |
|  | Executive attention | -0.060 | 1.304 | .193 | -0.054 | 0.011 |  |
| **Negative emotion regulation** | |  |  |  |  |  | .003 |
|  | Alerting | 0.015 | 0.333 | .740 | -0.045 | 0.063 |  |
|  | Orienting | 0.097 | 2.058 | .040 | 0.003 | 0.117 |  |
|  | Executive attention | -0.003 | 0.061 | .951 | -0.042 | 0.039 |  |

*Note.**β*= standardized partial regression coefficient.

Supplementary Table 5. Result of the multiple regression analysis for predicting emotion regulation abilities with mindfulness.

| Dependent variables | Independent variables | ***β*** | ***t*** | ***p*** | ***95% CI*** | | ***R2*** |
| --- | --- | --- | --- | --- | --- | --- | --- |
| ***Lower*** | ***Upper*** |
| **Positive emotion regulation** | |  |  |  |  |  | .227 |
|  | Observing | -0.069 | 1.549 | .122 | -0.395 | 0.047 |  |
|  | Nonreactivity | 0.055 | 1.312 | .190 | -0.090 | 0.453 |  |
|  | Nonjudging | 0.074 | 1.618 | .106 | -0.035 | 0.365 |  |
|  | Describing | 0.171 | 3.954 | < .001 | 0.189 | 0.562 |  |
|  | Acting with awareness | 0.352 | 7.963 | < .001 | 0.645 | 1.068 |  |
| **Negative emotion regulation** | |  |  |  |  |  | .439 |
|  | Observing | -0.064 | 1.694 | .091 | -0.424 | 0.031 |  |
|  | Nonreactivity | 0.275 | 7.705 | < .001 | 0.818 | 1.379 |  |
|  | Nonjudging | 0.299 | 7.635 | < .001 | 0.596 | 1.009 |  |
|  | Describing | 0.152 | 4.117 | < .001 | 0.211 | 0.596 |  |
|  | Acting with awareness | 0.300 | 7.951 | < .001 | 0.664 | 1.099 |  |

*Note.**β*= standardized partial regression coefficient.
